# Supplementary material
Source: PubMed Central journal article supplement (PMC3639585)

| <b>Table S1. Strains and Plasmids Used in this Study</b> |                                                                                                                                         |
|----------------------------------------------------------|-----------------------------------------------------------------------------------------------------------------------------------------|
| <b>Name</b>                                              | <b>Description</b>                                                                                                                      |
| <b>Strains</b>                                           |                                                                                                                                         |
| KIM5                                                     | <i>Y. pestis pgm-</i> , (pCD1+, pMT1+, pPCP1+) (1)                                                                                      |
| CC001                                                    | KIM5 <i>rfaL</i> ::CM (pKD46+)                                                                                                          |
| CC003                                                    | KIM5 $\Delta rfaL$                                                                                                                      |
| CC004                                                    | CC003 $\Delta yopN$                                                                                                                     |
| CC006                                                    | CC003 $\Delta lcrQ$                                                                                                                     |
| AH020                                                    | KIM5 pCD1( $\Delta sycE$ - <i>yopE</i> :: <i>kan</i> , $\Delta sycF$ ) from YP656 (2)                                                   |
| AH021                                                    | CC003 pCD1( $\Delta sycE$ - <i>yopE</i> :: <i>kan</i> , $\Delta sycF$ ) from YP656 (2)                                                  |
| MEL2                                                     | KIM5 $\Delta lcrQ$ (3)                                                                                                                  |
| MEL17                                                    | KIM5 <i>yscU</i> ::CM (pMM1+)                                                                                                           |
| MEL18                                                    | KIM5 <i>yopN</i> - made using pMM61                                                                                                     |
| MEL20                                                    | KIM5 <i>yscU</i> ::CM                                                                                                                   |
| KIM5-3001.P61( $\Delta sycF$ )                           | Sm <sup>r</sup> pCD1( $\Delta sycE$ - <i>yopE</i> :: <i>kan</i> , $\Delta sycF$ ), pCP1+, pMT1+ (2)                                     |
| KIM5( $\Delta y1324$ )( $\Delta ail$ )                   | KIM5 $\Delta ail$ :: <i>kan</i> (pCD1+, pPCP1+, pMT1+) (4)                                                                              |
| <b>Plasmids</b>                                          |                                                                                                                                         |
| pBSCK-YscF(D46A)                                         | Contains YscF with glutamic acid at position 46 replaced with an alanine. (2)                                                           |
| pBSCK-YscF(D46C)                                         | Contains YscF with glutamic acid at position 46 replaced with an cysteine (2)                                                           |
| pCP20                                                    | Flippase containing plasmid used for flipping out <i>cat</i> cassette (5)                                                               |
| pDONR:: <i>rfaL</i>                                      | Used to complement <i>rfaL</i> mutant (6)                                                                                               |
| pKD46                                                    | Contains Lambda-red recombinase genes (5)                                                                                               |
| pLC28                                                    | Derivative of the pEP185.2 suicide vector containing <i>sacB</i> (7)                                                                    |
| pKOBEG-sacB                                              | Contains the <i>sacB</i> gene and Lambda-red recombinase genes expressed under the control of the arabinose-inducible pBAD promoter (8) |
| pMM1                                                     | pKOBEG-sacB with <i>npt</i> cassette from Tn903 replacing the <i>cat</i> cassette.                                                      |
| pMM54                                                    | pLC28 + <i>lcrQ</i> containing a stop frameshift mutation inserted after the 6 <sup>th</sup> codon (3)                                  |

|       |                                                                                                           |
|-------|-----------------------------------------------------------------------------------------------------------|
| pMM61 | pLC28 + <i>yopN</i> containing a stop frameshift mutation inserted after the 27 <sup>th</sup> nucleotide. |
| pMM83 | YopM with a C-terminal Bla fusion (9)                                                                     |
| pMM85 | YopE with a C-terminal Bla fusion (9)                                                                     |

#### REFERENCES

1. **Brubaker, R. R.** 1969. Mutation rate to nonpigmentation in *Pasteurella pestis*. J Bacteriol **98**:1404-1406.
2. **Torruellas, J., M. W. Jackson, J. W. Pennock, and G. V. Plano.** 2005. The *Yersinia pestis* type III secretion needle plays a role in the regulation of Yop secretion. Mol Microbiol **57**:1719-1733.
3. **Sorg, J. A., N. C. Miller, M. M. Marketon, and O. Schneewind.** 2005. Rejection of impassable substrates by *Yersinia* type III secretion machines. J Bacteriol **187**:7090-7102.
4. **Bartra, S. S., K. L. Styer, D. M. O'Bryant, M. L. Nilles, B. J. Hinnebusch, A. Aballay, and G. V. Plano.** 2008. Resistance of *Yersinia pestis* to complement-dependent killing is mediated by the Ail outer membrane protein. Infect Immun **76**:612-622.
5. **Datsenko, K. A., and B. L. Wanner.** 2000. One-step inactivation of chromosomal genes in *Escherichia coli* K-12 using PCR products. Proc Natl Acad Sci U S A **97**:6640-6645.
6. **Houppert, A. S., E. Kwiatkowski, E. M. Glass, K. L. Debord, P. M. Merritt, O. Schneewind, and M. M. Marketon.** 2012. Identification of Chromosomal Genes in *Yersinia pestis* that Influence Type III Secretion and Delivery of Yops into Target Cells. PLoS One **7**:e34039.
7. **Cheng, L. W., D. M. Anderson, and O. Schneewind.** 1997. Two independent type III secretion mechanisms for YopE in *Yersinia enterocolitica*. Mol Microbiol **24**:757-765.
8. **Derbise, A., B. Lesic, D. Dacheux, J. M. Ghigo, and E. Carniel.** 2003. A rapid and simple method for inactivating chromosomal genes in *Yersinia*. FEMS Immunol Med Microbiol **38**:113-116.
9. **Marketon, M. M., R. W. DePaolo, K. L. DeBord, B. Jabri, and O. Schneewind.** 2005. Plague bacteria target immune cells during infection. Science **309**:1739-1741.

---

**Table S2. Primers Used in this Study**

---

| Primer name      | Primer Sequence                                              |
|------------------|--------------------------------------------------------------|
| M13 Reverse      | CAGGAAACAGCTATGAC                                            |
| M13(-21) Forward | TGTAAAACGACGGCCAGT                                           |
| pKD13kan.P1      | GTGTAGGCTGGAGCTGCTTC                                         |
| pKD13kan.P4      | ATTCCGGGGATCCGTCGACC                                         |
| y3762-attB1      | AAAAAGCAGGCTTCCTCTTTGGAAGGCTCCTTGC                           |
| y3762-attB2      | AGAAAGCTGGGTCTCTGAATGTGTATTGCGTCT                            |
| y3762down        | ATGATCAACATAACCCTAGT                                         |
| y3762up          | GCCTGAACTGGCGGTCTTAA                                         |
| y3762KO-P1       | TGACAACCTTTATCACCGGCAATTCCGGTCAATCGCGTGTAGGCTGGAG<br>CTGCTTC |
| y3762KO-P2       | CGTTGGCAGCCGTTTACCTGCTATGGATTGAGCATATGAATATCCTCC<br>TTAG     |
| yopN.ko.Eco1     | AAGAATTCGGCAATACCCCGCTGCATAATGAG                             |
| yopN.ko.Eco2     | AAGAATTCATCAATAAGATAGGTTATGAAGCGTCC                          |
| yopN.ko.Sall     | AAGTCGACCTCAATAGCCATATCGATCG                                 |
| yopN.ko.XbaI     | AATCTAGAGCAAACCGTGTTACAGAGTCC                                |
| yscU.P1          | CTATAAGTTTACTGATCCCTGTTTTGGAGAAGTAATGA                       |
| yscU.P2          | GTTTTAACCATATTCCTAGTTACATTGCAGCCTATTA                        |
| yscU.up          | GCTTTTTCCCTGCAGTTAGT                                         |
| yscU.down        | GATGTTTGGTTAGAATCGGA                                         |

---

**Fig. S1. Confirmation of *rfaL* mutant phenotypes.** **A)** Secretion assays were performed with wild type,  $\Delta rfaL$ , and the  $\Delta rfaL$  (*+rfaL*) strains. Cultures were centrifuged to separate secreted proteins (S) from the cell pellet (P). Antibodies to the  $\alpha$  subunit of the RNA polymerase (RpoA) and to YscD, a structural component of the T3SS injectisome, were used as controls for proper fractionation. **B)** 6-8 week old C57BL/6 mice were infected retro-orbitally with each strain at a dose of  $\sim 10^2$  CFU. Mice were monitored until they became moribund or recovered. Moribund mice were euthanized. Survival trends were compared using the Log-rank test.

**Fig. S2. Mutations in *yscF* cannot bypass the secretion defect of a  $\Delta rfaL$  mutant.** Wild type, wild type expressing YscF(D46A) or YscF(D46C),  $\Delta rfaL$ , and  $\Delta rfaL$  strains expressing YscF(D46A) or YscF(D46C) were grown in DMEM at 37°C with or without EGTA (-Ca or +Ca). Following the incubation the cultures were centrifuged to separate secreted proteins (S) from cells (P). The proteins in both fractions were TCA precipitated and immunoblotting was performed using antibodies against YscD, YopD, YopH, YopM, and RpoA. The < indicates full length YopH and \* represents YopH degradation products.

**Fig. S3. Effects of RfaL on Pla abundance and plasminogen activation. A-C)** Plasminogen activation assays were performed on wild type,  $\Delta rfaL$ , and  $\Delta rfaL+rfaL$  strains cultured at 26°C or 37°C in the presence or absence of 2.5 mM CaCl<sub>2</sub>. The assay was performed twice with samples analyzed in duplicate, and one representative trial is shown. **D)** Pla protein levels were assessed in the same strains by immunoblot analysis. Decreased abundance of autoprocessed Pla (arrow) in the  $\Delta rfaL$  strain compared to wild-type or complement is observed. RpoA is shown as a loading control.

**Fig. S4. Complement Sensitivity Assay.** Wild type,  $\Delta rfaL$ , and  $\Delta ail$  strains were grown overnight in HIB at 26 °C. Cells were then incubated at 37 °C for 1 hour in normal human serum (NHS), heat inactivated serum (HIS), or saline (PBS). Where indicated EGTA was added to the overnight cultures as well as the serum assays. After the incubation period, cells were serially diluted and plated in triplicate on HIA. Colonies were counted and the average Log (10) CFU/mL was determined. Data shown is representative of two independent trials.

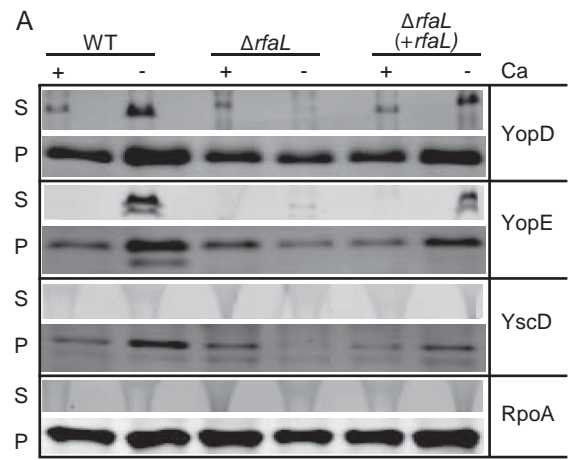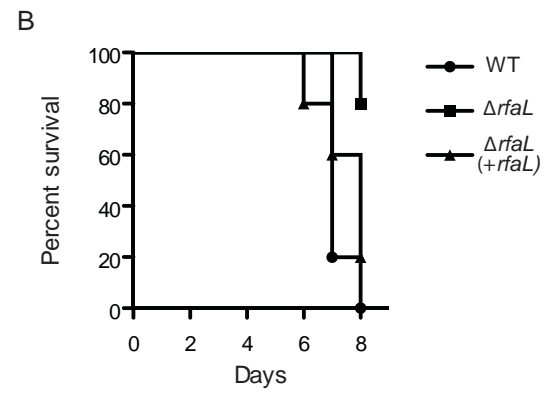

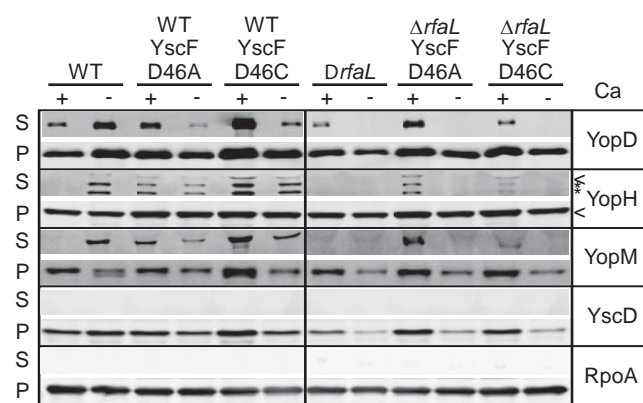

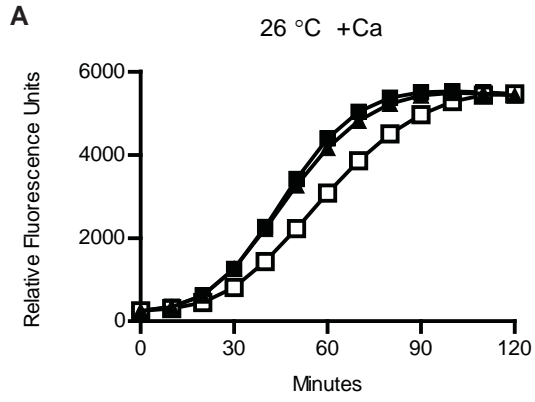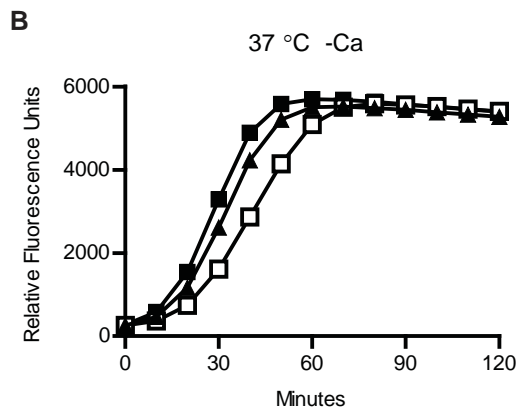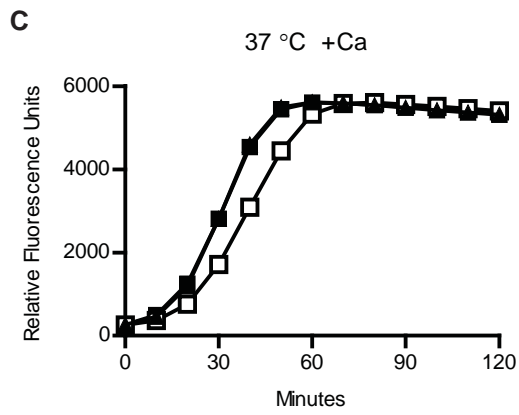

■ WT □  $\Delta rfaL$  ▲  $\Delta rfaL+rfaL$

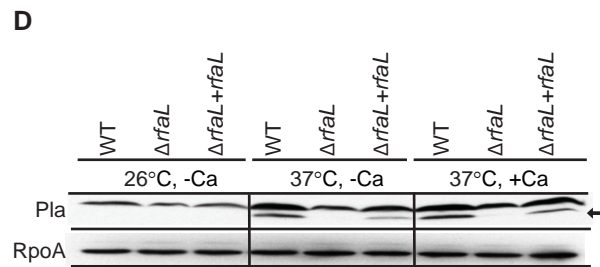

No EGTA

+ EGTA Overnight

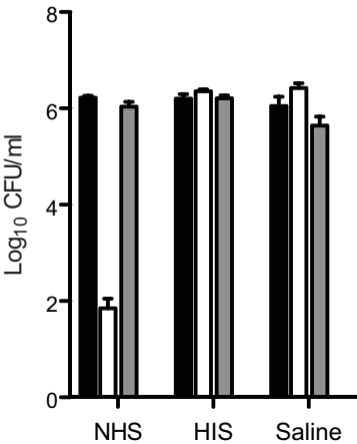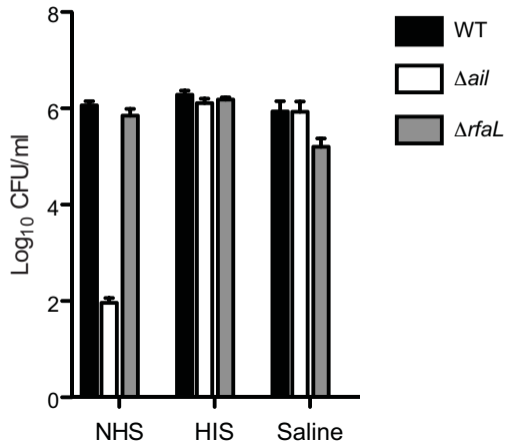

Supplement: IAI.01417-12_zii999090065so1.pdf [file IAI.01417-12_zii999090065so1.pdf]
